# Supplementary material
Source: bioRxiv or medRxiv preprint supplement (https://medrxiv.org/content/medrxiv/early/2020/11/24/2020.11.23.20237149/DC4/embed/media-4.pdf)
Supplement: Supplementary file [file media-4.pdf]

## Appendix

**Table 3:** Modelisation with each experience compared to aerosol emission at 25 cm without protection

| <i>Predictors</i>                                                                 | <i>Estimates</i> | <b>log(n)</b> |                  |
|-----------------------------------------------------------------------------------|------------------|---------------|------------------|
|                                                                                   |                  | <i>CI</i>     | <i>p</i>         |
| (Intercept)                                                                       | 14.61            | 14.41 – 14.81 | <b>&lt;0.001</b> |
| Aerosol emission at 25 cm without protection (1)                                  | Ref.             |               |                  |
| Background noise (0)                                                              | -5.41            | -5.63 – -5.18 | <b>&lt;0.001</b> |
| Aerosol emission at 25 cm + mask on receiver (2)                                  | -1.65            | -1.88 – -1.43 | <b>&lt;0.001</b> |
| Aerosol emission at 25 cm + face shield on receiver (2A)                          | -2.53            | -2.75 – -2.30 | <b>&lt;0.001</b> |
| Aerosol emission at 25 cm + mask on emitter (3)                                   | -4.80            | -5.02 – -4.57 | <b>&lt;0.001</b> |
| Aerosol emission at 25 cm + face shield on emitter (3A)                           | -5.01            | -5.24 – -4.79 | <b>&lt;0.001</b> |
| Aerosol emission at 25 cm + mask on receiver + mask on emitter (4)                | -4.98            | -5.21 – -4.76 | <b>&lt;0.001</b> |
| Aerosol emission at 25 cm + face shield on receiver + face shield on emitter (4A) | -5.17            | -5.40 – -4.94 | <b>&lt;0.001</b> |
| Particule [0,5 $\mu$ ]                                                            | -1.05            | -1.24 – -0.87 | <b>&lt;0.001</b> |
| Particule [1 $\mu$ ]                                                              | -2.70            | -2.88 – -2.52 | <b>&lt;0.001</b> |
| Particule [2,5 $\mu$ ]                                                            | -4.45            | -4.63 – -4.26 | <b>&lt;0.001</b> |
| Particule [5 $\mu$ ]                                                              | -5.67            | -5.86 – -5.49 | <b>&lt;0.001</b> |
| Particule [10 $\mu$ ]                                                             | -6.94            | -7.12 – -6.75 | <b>&lt;0.001</b> |
